# Supplementary material for: Exploiting biofilm phenotypes for functional characterization of hypothetical genes in Enterococcus faecalis
Source: PubMed Central journal article supplement (PMC6753144; doi:10.1038/s41522-019-0099-0), 2019-09-19
Supplement: 41522_2019_99_MOESM1_ESM.pdf [file 41522_2019_99_MOESM1_ESM.pdf]

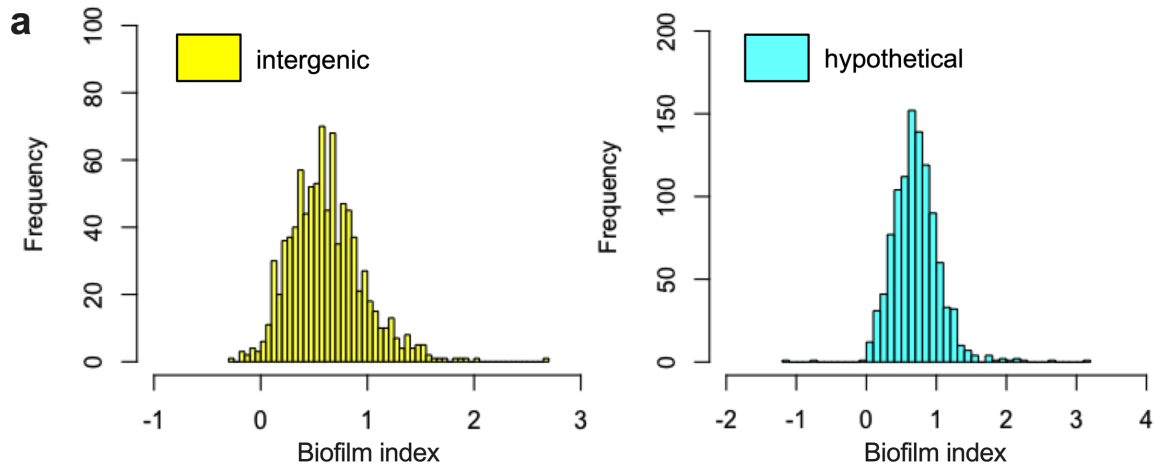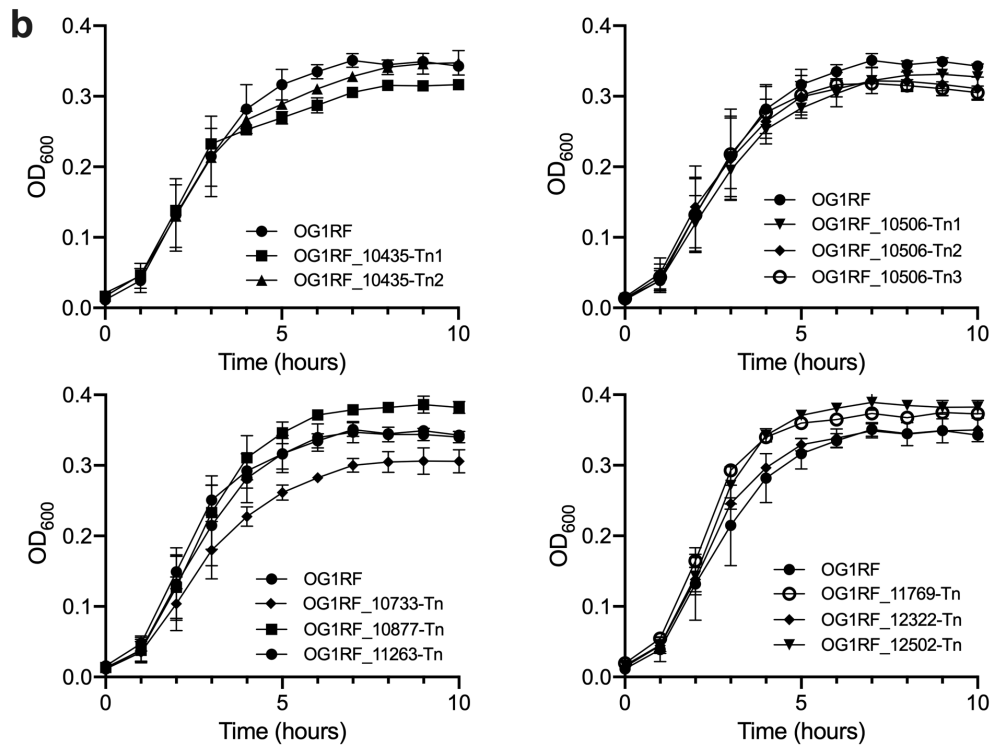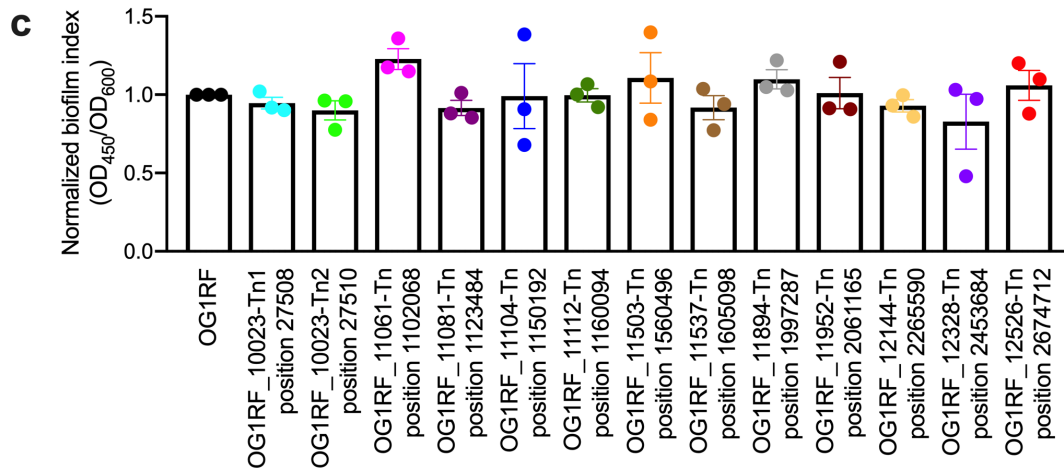

**Supplementary Figure 1. Biofilm screen of arrayed transposon library and *in vitro* attachment of selected low-biofilm mutants.** **a)** Distribution of biofilm index values relative to OG1RF (biofilm = 1.0) obtained in the arrayed Tn library screen. Insertions in intergenic regions are represented by yellow bars, and insertions in hypothetical genes are represented by cyan bars. **b)** Growth curves of putative low-biofilm mutants selected from initial Tn library screen. Mutants were grown in a 96-well plate in tryptic soy broth without added dextrose. Values are the average of three independent replicates with independent error of the mean. **c)** Biofilm production at 6 hr was measured for Tn mutants with high levels of biofilm in the primary screen. Each data point represents a biological replicate. The nucleotide position of each Tn insertion is indicated in the x-axis labels.

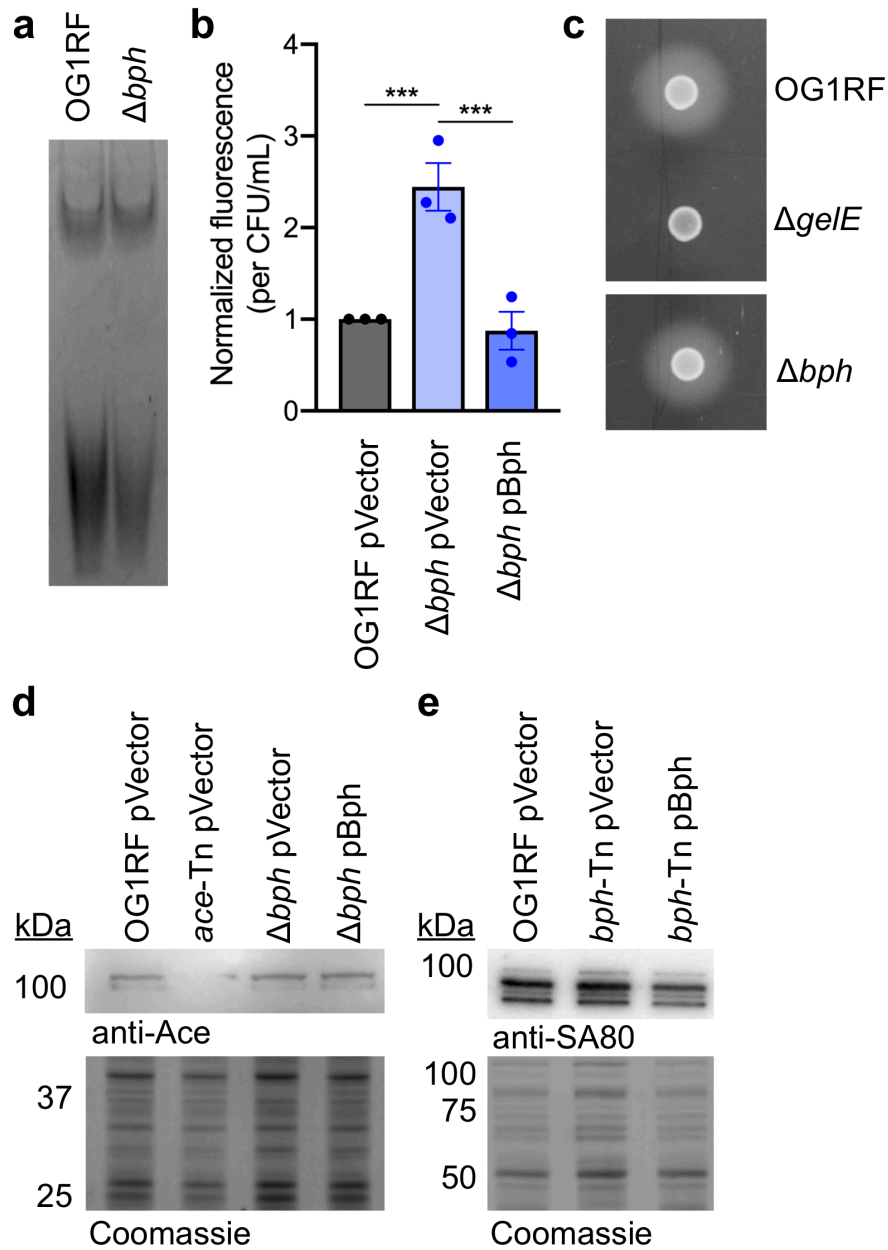

**Supplementary Figure 2. *bph* mutations do not affect general biofilm**

**determinants or surface proteins.** **a)** Polysaccharides harvested from cells in mid-logarithmic phase were separated on a native gel. **b)** Extracellular DNA was quantified using PicoGreen and normalized to CFU/mL of the cell culture. Values are presented relative to parental OG1RF. Each data point represents a biological replicate. Statistical significance was determined by one-way ANOVA (\*\* $q < 0.001$ ).

**c)** Gelatinase activity was measured using agar plates supplemented with 3% gelatin. Hazy zones surrounding colonies are indicative of gelatinase activity. **d)** Ace levels were detected in whole-cell lysates via Western blot with an anti-Ace antibody (top panel). **e)** SA80 was detected in the cell wall fraction via Western blot with an anti-SA80 antibody (top panel). For **d** and **e**, Coomassie-stained load controls are shown (bottom panels).

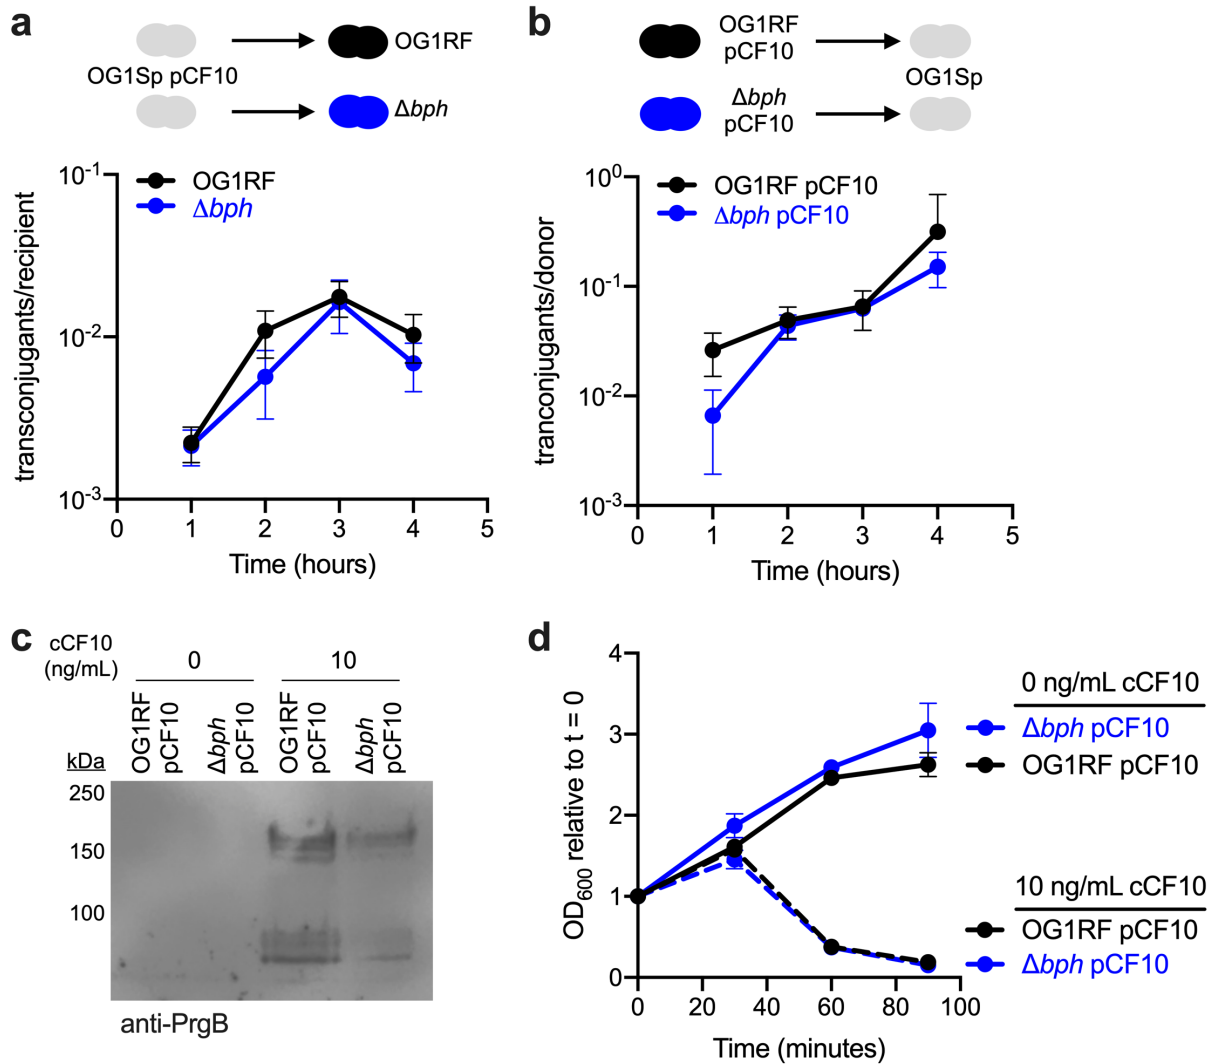

### Supplementary Figure 3. Effect of *bph* on conjugation and transfer of pCF10.

Transfer of pCF10 between cells was measured using **a)** OG1RF and  $\Delta bph$  as recipients and **b)** OG1RF and  $\Delta bph$  carrying pCF10 as donor strains. Cells were grown separately for 1 hr and mixed at a 9:1 recipient:donor ratio. At indicated timepoints, transconjugants, donors, and recipients were selected on antibiotic agar plates and enumerated. Data points represent three biological replicates, and error bars represent standard error of the mean. **c)** Whole-cell lysates were harvested 1 hr after induction with 10 ng/mL cCF10. Proteins were separated using SDS-PAGE and transferred to nitrocellulose, and aggregation substance was detected using an anti-PrgB antibody. **d)** Aggregation of OG1RF and  $\Delta bph$  carrying pCF10 after induction with exogenous cCF10 (10 ng/mL) was measured by tracking the OD<sub>600</sub> at the top of individual cultures.

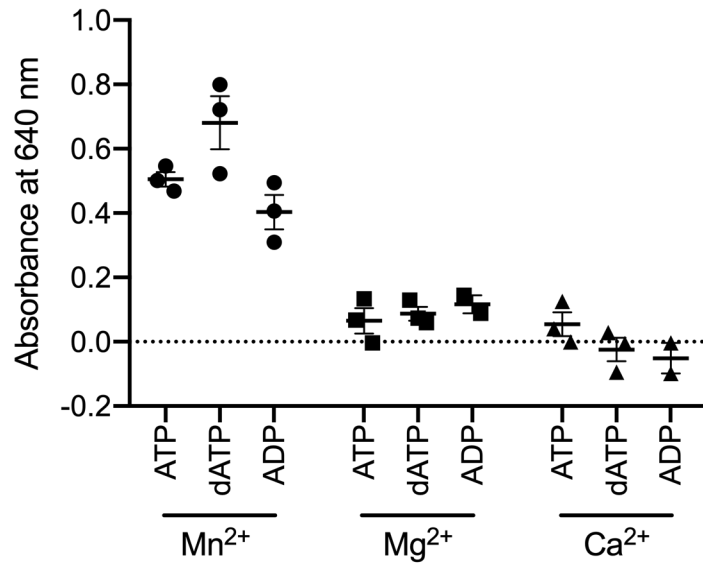

**Supplementary Figure 4. Bph requires manganese for phosphatase activity.**

Purified Bph-H6 was mixed with the indicated substrates in reaction buffer supplemented with various divalent cations. Free phosphate (measured by absorbance at 640 nm) was detected when manganese was used as the divalent cation, but not magnesium or calcium. Each data point represents a biological replicate. Error bars represent standard error of the mean.

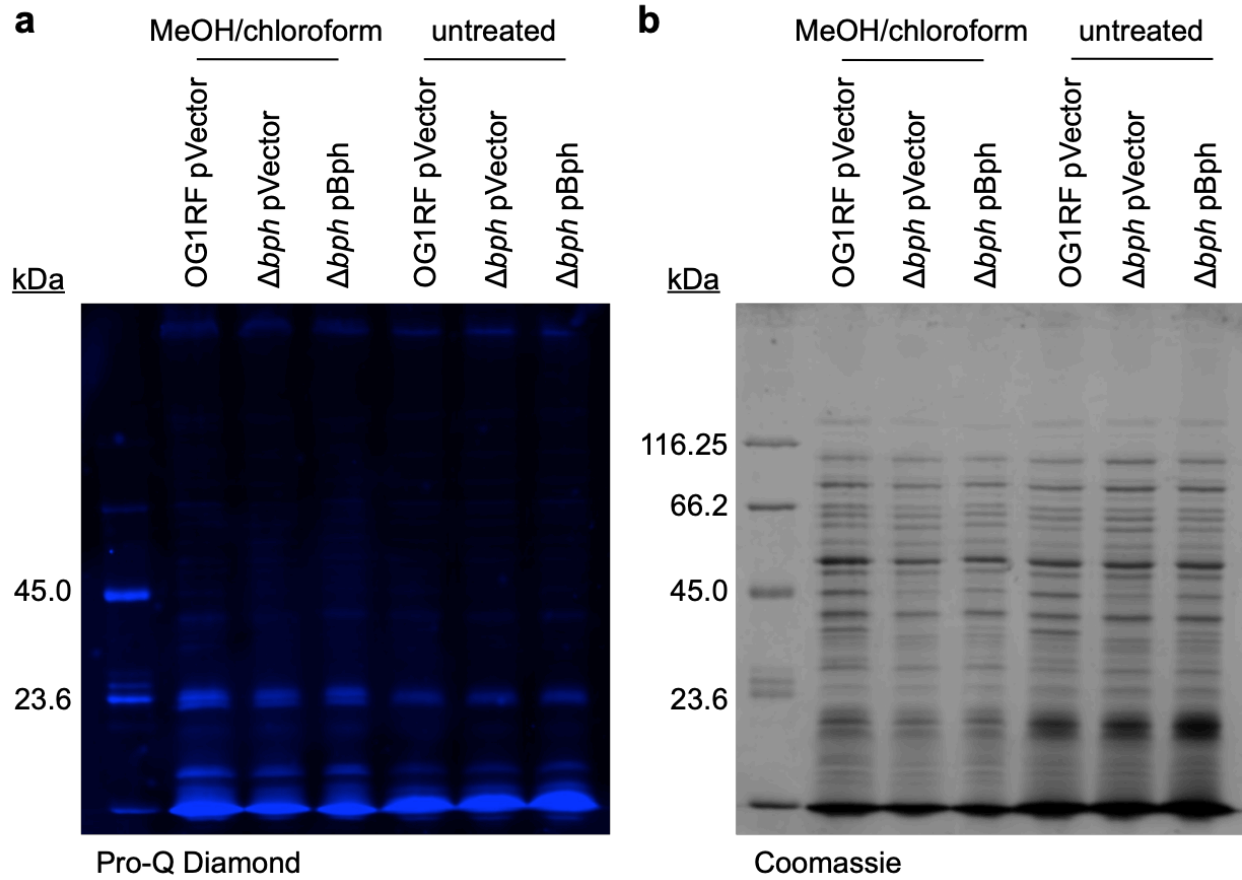

**Supplementary Figure 5. Effect of Bph on phosphoprotein content.** Whole-cell lysates were prepared from the indicated strains and separated by SDS-PAGE. **a)** The gel was incubated in ProQ Diamond phosphoprotein stain and imaged. Phosphoproteins are visualized as blue bands. **b)** The gel from panel **a** was incubated in Coomassie stain and imaged.

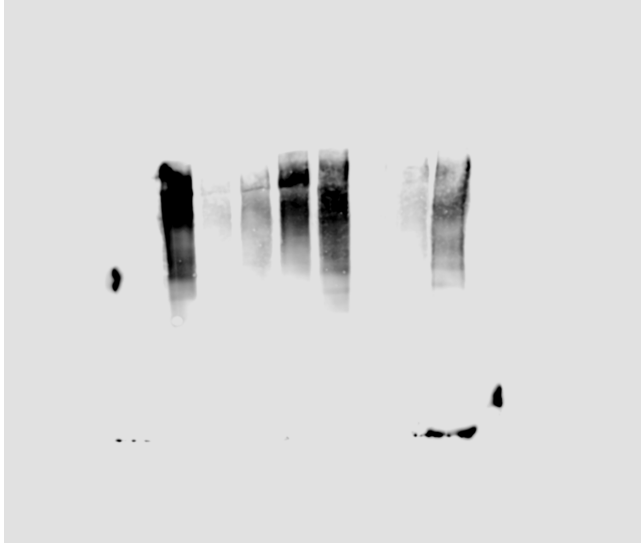

**Supplementary Figure 6. Uncropped anti-EbpC Western blot.**

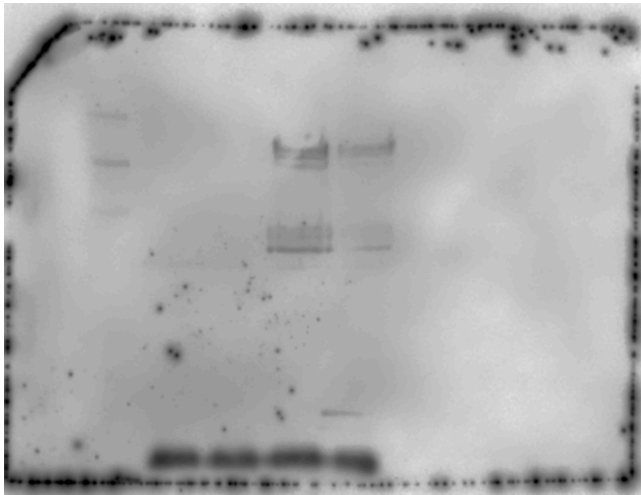

**Supplementary Figure 7. Uncropped anti-PrgB Western blot.**

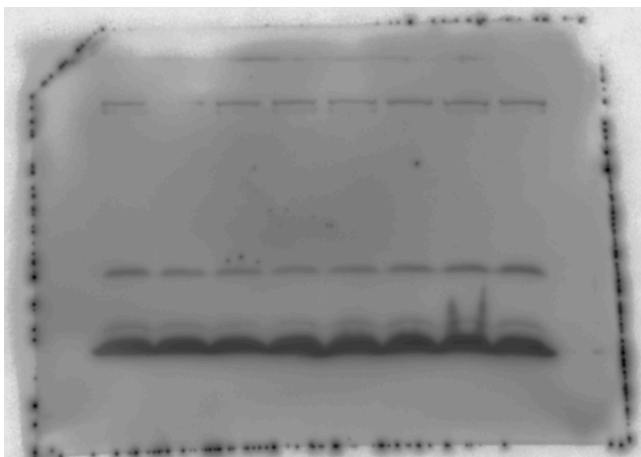

**Supplementary Figure 8. Uncropped anti-Ace Western blot.**

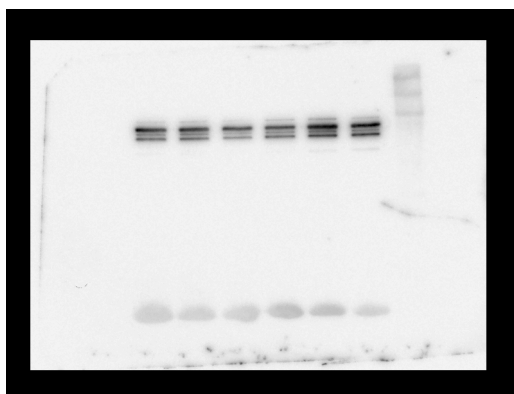

**Supplementary Figure 9. Uncropped anti-SA80 Western blot.**

| <b>Strain</b> | <b>Description</b>                                                         | <b>Relevant Characteristics</b>                                                                             | <b>Source</b>       |
|---------------|----------------------------------------------------------------------------|-------------------------------------------------------------------------------------------------------------|---------------------|
|               | <i>Enterococcus faecalis</i> OG1RF                                         | Parent strain, Rif <sup>R</sup> , Fus <sup>R</sup>                                                          | 1                   |
| JW271         | <i>Enterococcus faecalis</i> OG1RF $\Delta$ 10435 ( $\Delta$ <i>bapA</i> ) | Markerless deletion of OG1RF_10435, Rif <sup>R</sup> , Fus <sup>R</sup>                                     | This study          |
|               | <i>Enterococcus faecalis</i> OG1RF $\Delta$ <i>ahrC</i>                    | Markerless deletion of <i>ahrC</i> (OG1RF_10717), Rif <sup>R</sup> , Fus <sup>R</sup>                       | 2                   |
|               | <i>Escherichia coli</i> DH5 $\alpha$                                       | Laboratory K-12 cloning strain                                                                              | Fisher Scientific   |
|               | <i>Escherichia coli</i> BL21 (DE3)                                         | Laboratory strain for T7 expression                                                                         | New England Biolabs |
|               |                                                                            |                                                                                                             |                     |
|               | <b>Plasmids</b>                                                            | <b>Relevant Characteristics</b>                                                                             | <b>Source</b>       |
| pJW8          | pCIE-tet                                                                   | Pheromone-inducible pCIE vector with tetracycline resistance cassette, Tet <sup>R</sup>                     | This study          |
| pJW76         | pCIE-tet-MCS (pCIEtm)                                                      | pCIE-tet with modified multicloning site (BamHI/HincII-Sall/EcoRV/PvuI/NheI), Tet <sup>R</sup>              | This study          |
| pJW250        | pCIEtm::OG1RF_10435                                                        | Contains wild-type OG1RF_10435 ( <i>bapA</i> ) sequence with native ribosome-binding site, Tet <sup>R</sup> | This study          |
|               | pCJK205                                                                    | P <sub>23</sub> :: <i>lacZ</i> constitutive reporter plasmid derived from pMSP3535, Erm <sup>R</sup>        | 3                   |
|               | pCJK218                                                                    | Temperature-sensitive plasmid for allelic exchange and <i>pheS</i> counterselection, Cm <sup>R</sup>        | 4                   |
|               | pCJK218::OG1RF_10435-del                                                   | Allelic exchange plasmid containing genomic regions flanking OG1RF_10435, Cm <sup>R</sup>                   | This study          |
|               | pET28b+                                                                    | Plasmid vector carrying N-                                                                                  | Novagen             |



|        |                                 |                                                                                       |               |
|--------|---------------------------------|---------------------------------------------------------------------------------------|---------------|
|        |                                 | terminal and C-terminal His6 tags and an N-terminal thrombin-T7 tag, Kan <sup>R</sup> |               |
| pJW204 | pET28b+::OG1RF_10435-H6         | OG1RF_10435 coding sequence fused to C-terminal His6 tag                              | This study    |
| pJW246 | pET28b+::OG1RF_10435-H6 W70A    | OG1RF_10435 coding sequence with W70A mutation fused to C-terminal His6 tag           | This study    |
| pJW233 | pET28b+::OG1RF_10435-H6 Y85A    | OG1RF_10435 coding sequence with Y85A mutation fused to C-terminal His6 tag           | This study    |
| pJW237 | pET28b+::OG1RF_10435-H6 N87A    | OG1RF_10435 coding sequence with N87A mutation fused to C-terminal His6 tag           | This study    |
| pJW235 | pET28b+::OG1RF_10435-H6 D105A   | OG1RF_10435 coding sequence with D105A mutation fused to C-terminal His6 tag          | This study    |
| pJW336 | pCIEtm::OG1RF_10435 W70A        | pJW250 (OG1RF_10435 complementation vector) with W70A mutation, Tet <sup>R</sup>      | This study    |
| pJW337 | pCIEtm::OG1RF_10435 Y85A        | pJW250 (OG1RF_10435 complementation vector) with Y85A mutation, Tet <sup>R</sup>      | This study    |
| pJW338 | pCIEtm::OG1RF_10435 N87A        | pJW250 (OG1RF_10435 complementation vector) with N87A mutation, Tet <sup>R</sup>      | This study    |
| pJW339 | pCIEtm::OG1RF_10435 D105A       | pJW250 (OG1RF_10435 complementation vector) with D105A mutation, Tet <sup>R</sup>     | This study    |
|        | pTCV-LacSpec                    | pTCV-LacSpec, vector for promoter fusions, Spec <sup>R</sup>                          | 2             |
|        | pTCV-LacSpec::prom- <i>ebpR</i> | Promoter fusion <i>PebpR</i> (- 87) in pTCV-LacSpec, Spec <sup>R</sup>                | 2             |
|        | pTCV-LacSpec::prom- <i>ebpA</i> | Promoter fusion <i>PebpA</i> (- 100) in pTCV-LacSpec, Spec <sup>R</sup>               | 2             |
|        |                                 |                                                                                       |               |
|        | <b>Oligonucleotides</b>         | <b>Sequence</b>                                                                       | <b>Source</b> |
| JW54   | pCIE-tetM-MCS                   | 5' - AAA GTC GAC GAT ATC CGA TCG GCT AGC CCT AAA GAA GTA ACC ATG TAT TAT G - 3'       | This study    |
| JW59   | 10435-fwd                       | 5' - TTT AAG TGA ACT CAA TGT ACG C - 3'                                               | This study    |
| JW60   | 10435-rev                       | 5' - ACA AGT CAC CGC TGT AGG C - 3'                                                   | This study    |

|       |                    |                                                                    |            |
|-------|--------------------|--------------------------------------------------------------------|------------|
| JW93  | 10435-Pvu-rev      | 5' - TTT CGA TCG CTA TTT<br>TTT TGA TAG CTG TTG ATA<br>ACG - 3'    | This study |
| JW109 | 10435-Nco-fwd      | 5' - ATA CCA TGG GAA TTC<br>CTA AAG AAG G - 3'                     | This study |
| JW110 | 10435-Nhe-Xho-rev  | 5' - ATA CTC GAG GCT AGC<br>TTT TTT TGA TAG CTG TTG<br>ATA ACG -3' | This study |
| JW114 | 10435-W70A-fwd     | 5' - CAC AAG AAA TAT GCG<br>TTC AAT ATA ATA GC - 3'                | This study |
| JW115 | 10435-Y85A-fwd     | 5' - GGG TTT CGT ATG CCT<br>GCA ATC TGG CTT CG - 3'                | This study |
| JW116 | 10435-N87A-fwd     | 5' - GGG TTT CGT ATT ACT<br>GCG CTC TGG CTT CGC C -<br>3'          | This study |
| JW117 | 10435-D105A-fwd    | 5' - GTA TAT TGA TTA TGC<br>TTT AGA TAT CAA GG - 3'                | This study |
| JW130 | 10435-W70A-rev     | 5' - GCT ATT ATA TTG AAC<br>GCA TAT TTC TTG TG - 3'                | This study |
| JW133 | 10435-up-fwd-Bam   | 5'- GTT GGA TCC AGA ATA<br>TGG CC -3'                              | This study |
| JW134 | 10435-up-rev-Eco   | 5' - TAG GAA TTC CCA TAA<br>TAC CCC - 3'                           | This study |
| JW135 | 10435-down-fwd-Eco | 5' - ATA GAA TTC CTA AAT<br>AGC CGA TGT AAA CAG C -<br>3'          | This study |
| JW136 | 10435-down-rev-Sph | 5' - ACT GCA TGC TAG CTG<br>ATC TGC C - 3'                         | This study |
| JW163 | 10435-fwd-Bam      | 5' - TTT GGA TCC AAG TGA<br>ACT CAA TGT ACG C - 3'                 | This study |

**Supplementary Table 1. Bacterial strains, plasmids, and oligonucleotides used in this study.** Cm<sup>R</sup>, chloramphenicol; Fus<sup>R</sup>, fusidic acid; Rif<sup>R</sup>, rifampicin; Tet<sup>R</sup>, tetracycline; Spec<sup>R</sup>, spectinomycin. Restriction enzyme sites in oligonucleotides are included in the name or in parentheses.

- 1 Dunny, G., Funk, C. & Adsit, J. Direct stimulation of the transfer of antibiotic resistance by sex pheromones in *Streptococcus faecalis*. *Plasmid* **6**, 270-278 (1981).
- 2 Manias, D. A. & Dunny, G. M. Expression of Adhesive Pili and the Collagen-Binding Adhesin Ace Is Activated by ArgR Family Transcription Factors in *Enterococcus faecalis*. *J Bacteriol* **200**, doi:10.1128/JB.00269-18 (2018).
- 3 Djorić, D. & Kristich, C. J. Oxidative stress enhances cephalosporin resistance of *Enterococcus faecalis* through activation of a two-component signaling system. *Antimicrob Agents Chemother* **59**, 159-169, doi:10.1128/AAC.03984-14 (2015).

- 4 Vesić, D. & Kristich, C. J. A Rex family transcriptional repressor influences H<sub>2</sub>O<sub>2</sub> accumulation by *Enterococcus faecalis*. *J Bacteriol* **195**, 1815-1824, doi:10.1128/JB.02135-12 (2013).
